# Supplementary material for: Labeling and monitoring the distribution of anchoring sites on functionalized CNTs by atomic layer deposition
Source: Royal Society of Chemistry journal article supplement (doi:10.1039/c2jm00088a), 2012-01-01
Supplement: c2jm00088a.pdf [file c2jm00088a.pdf]

## Online Supplementary Information

-----

### Labeling and monitoring the distribution of anchoring sites on functionalized CNTs by atomic layer deposition

Catherine Marichy<sup>1</sup>, Jean-Philippe Tessonier<sup>2</sup>, Marta C. Ferro<sup>3</sup>, Kyeong-Hwan Lee<sup>4</sup>, Robert Schlögl<sup>5</sup>, Nicola Pinna<sup>1,4,\*</sup>, Marc-Georg Willinger<sup>1,5,\*</sup>

1 - Department of Chemistry, CICECO, University of Aveiro, 3810-193 Aveiro, Portugal.

2 - Department of Chemical Engineering, University of Delaware, Newark, DE 19716, United States

3 - Department of Ceramics and Glass Engineering, CICECO, University of Aveiro, 3810-193 Aveiro, Portugal.

4 - World Class University (WCU) program of Chemical Convergence for Energy & Environment (C2E2), School of Chemical and Biological Engineering, College of Engineering, Seoul National University (SNU), Seoul 151-744, Korea.

5 - Department of Inorganic Chemistry, Fritz Haber Institute of the Max Planck Society, Berlin, Germany

**Corresponding author emails:** willinger@fhi-berlin.mpg.de, pinna@ua.pt, pinna@snu.ac.kr

**Keywords:** Atomic Layer Deposition, Carbon Nanotubes, Surface Functionalization, Nanostructures, Titanium Oxide

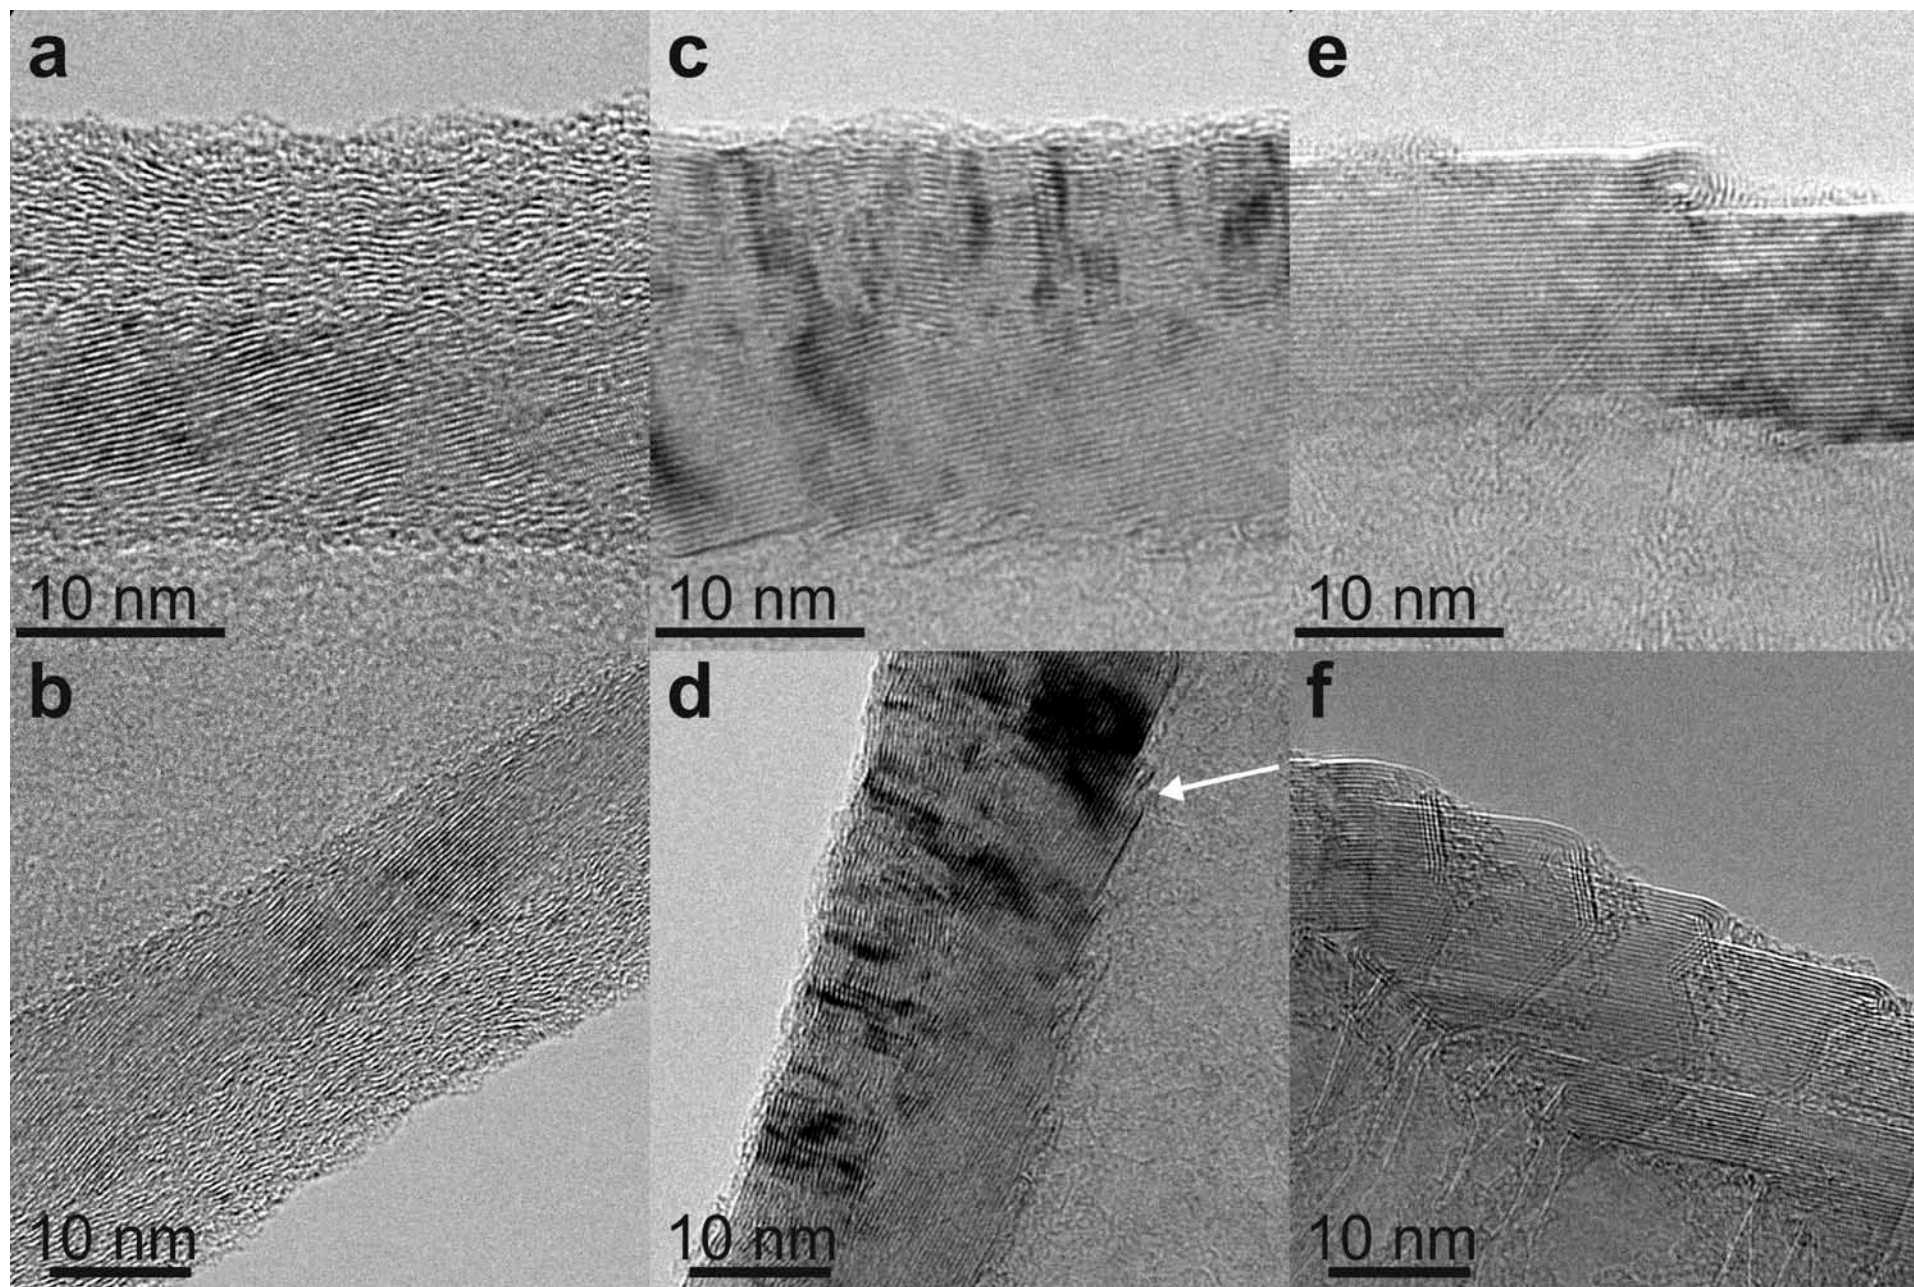

**Figure 1.** HRTEM images of the different CNTs prior to  $\text{TiO}_2$  ALD. CNT700: (a, b), CNT1500: (c, d) and CNT3000, the latter before nitric acid treatment: (e, f).



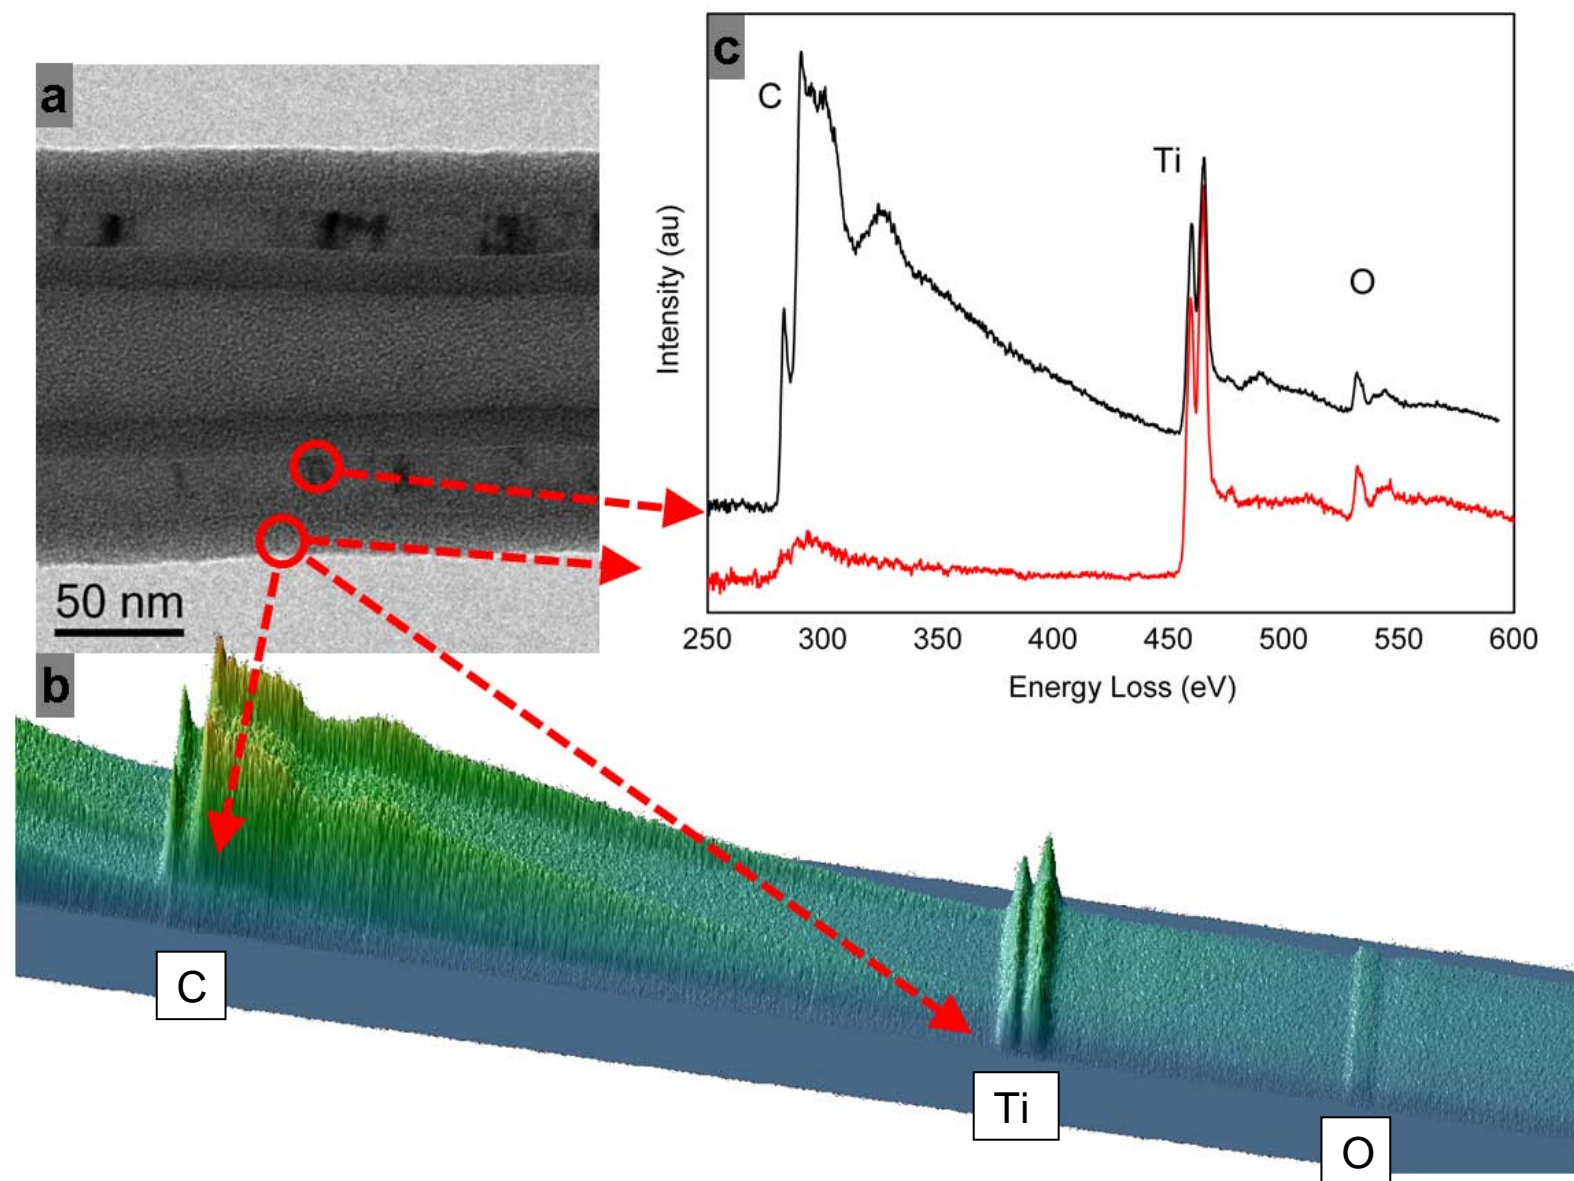

**Figure 2.** a) Shows the part of a TiO<sub>2</sub> coated CNT from where the EELS signal was recorded (Film thickness ~ 16nm). The recorded intensity is shown in (b) as a three-dimensional plot in the energy dispersive plane. It nicely reveals the development of the C-K, Ti-L and O-K edges across the tube. The EELS spectra abstracted from the coating (red) and from a region where signal is due to the film on the top and bottom surface plus the CNTs walls (black) are shown in (c).



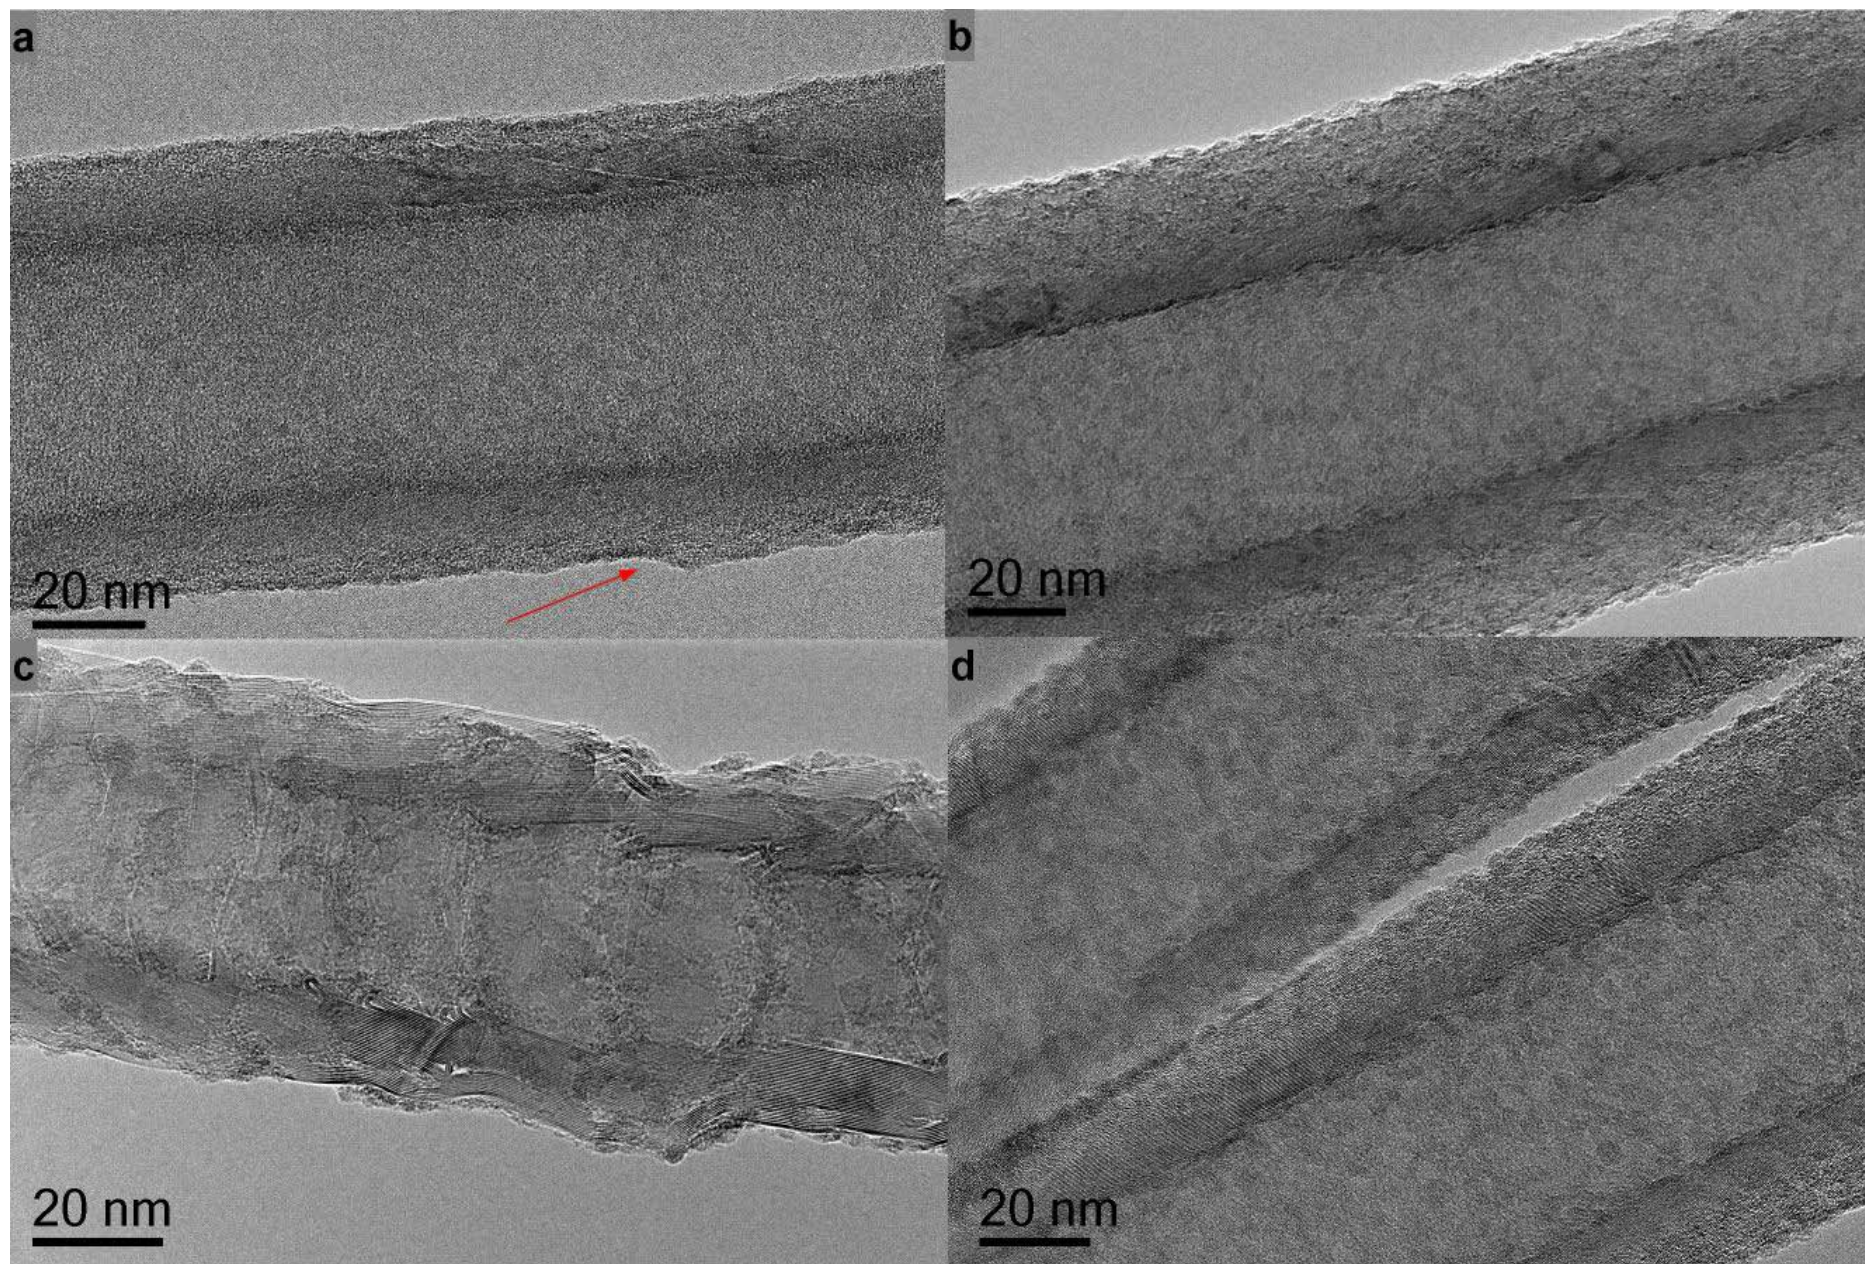

**Figure 3.** Overview TEM images of CNTs coated with TiO<sub>2</sub> by ALD. (a) CNT700 (100cycles), (b) CNT1500 (50cycles), (c) CNT3000 (50cycles), (d) CNT700D (100cycles).



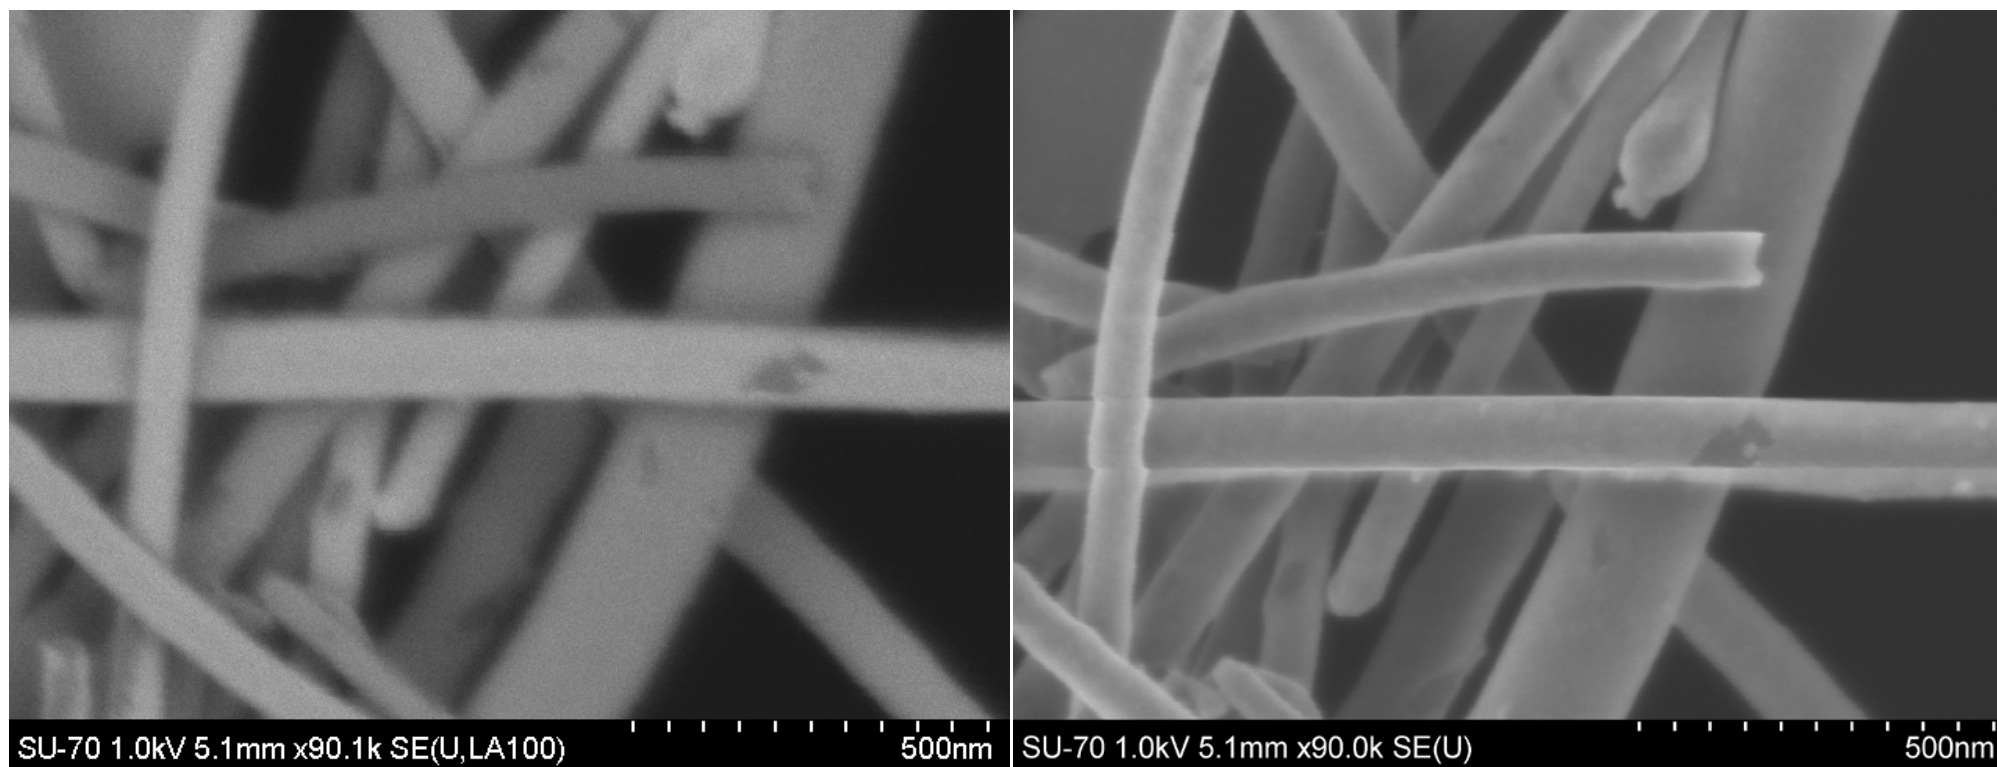

**Figure SI1.** SEM images of the CNT700 coated with 65 TiO<sub>2</sub> ALD cycles recorded using secondary electrons (left) and backscattered electrons (right)



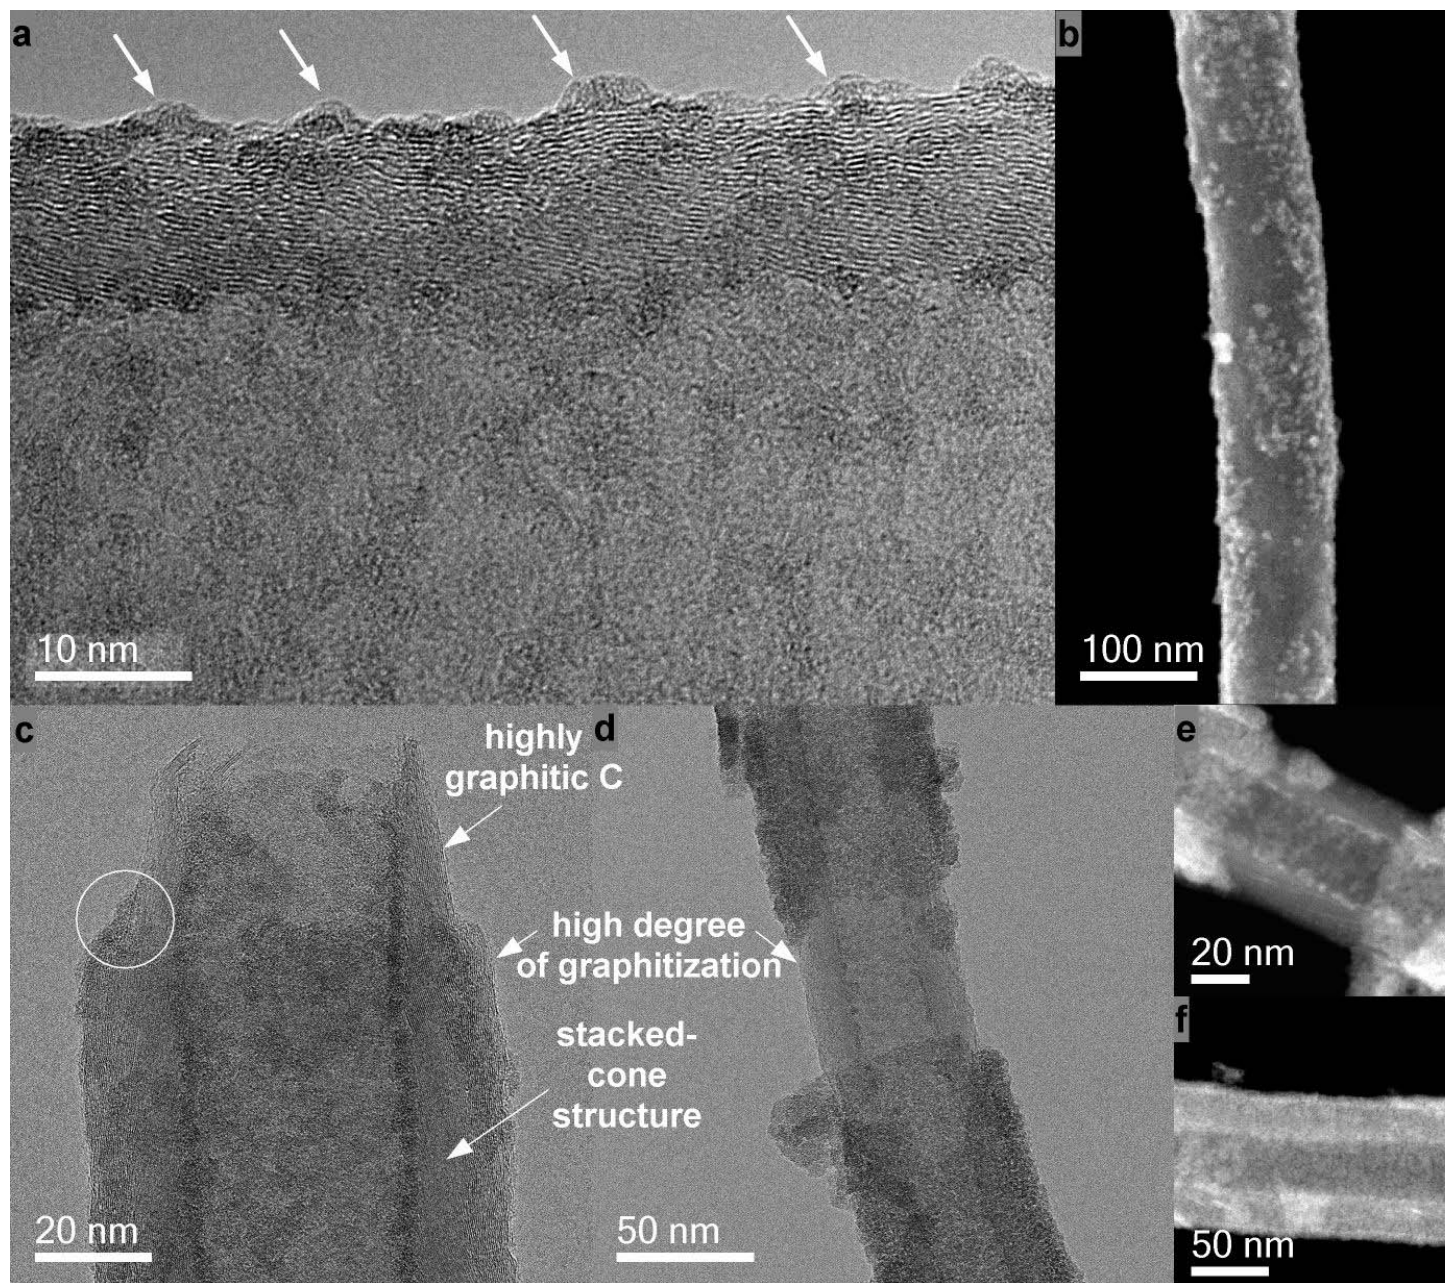

**Figure 4.** HRTEM (a) and SEM (b) images recorded from the CNT1500 coated during 50 cycles. (c), (d) and (e), (f) show uncoated regions on tubes in HRTEM and HAADF-STEM images recorded from tubes coated during 100 cycles.



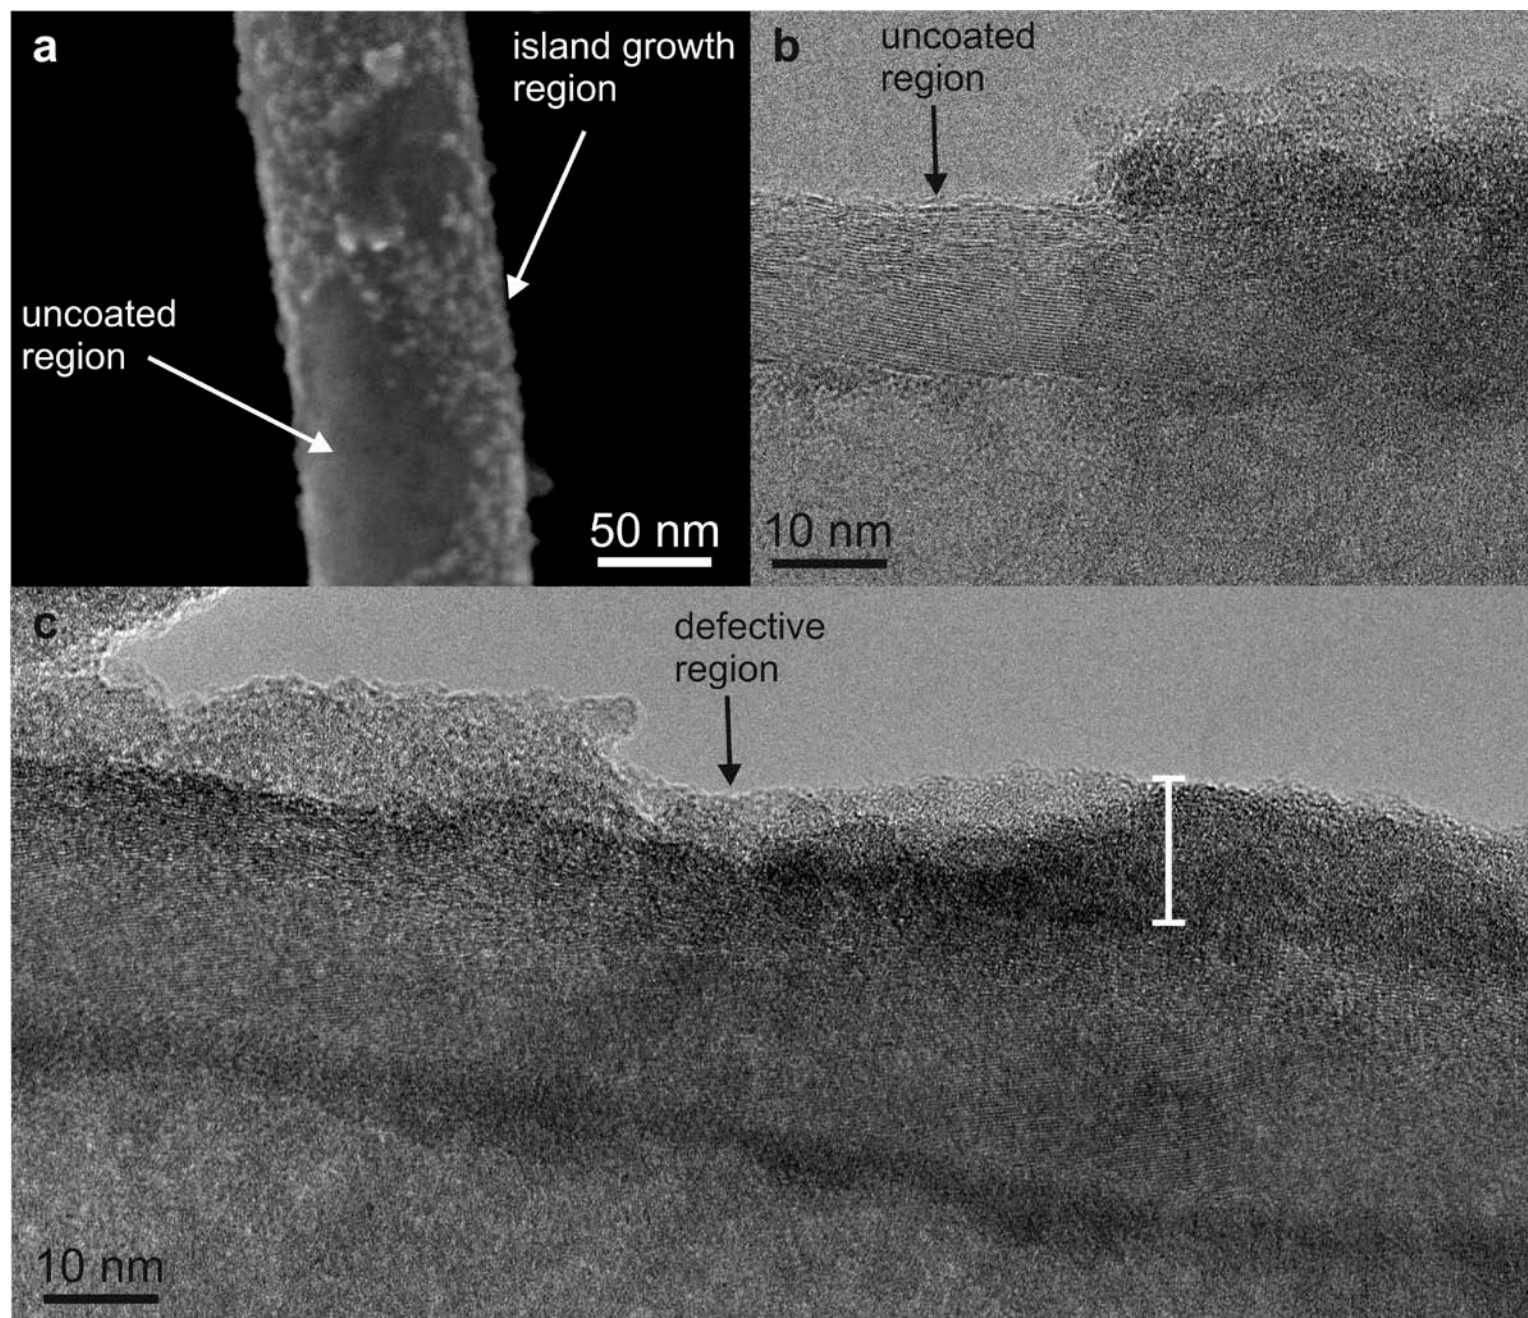

**Figure SI2.** (a) HRSEM image recorded from the CNT1500 coated during 50 cycles. HRTEM images recorded from tubes coated during 100 (b) and 500 (c) cycles.



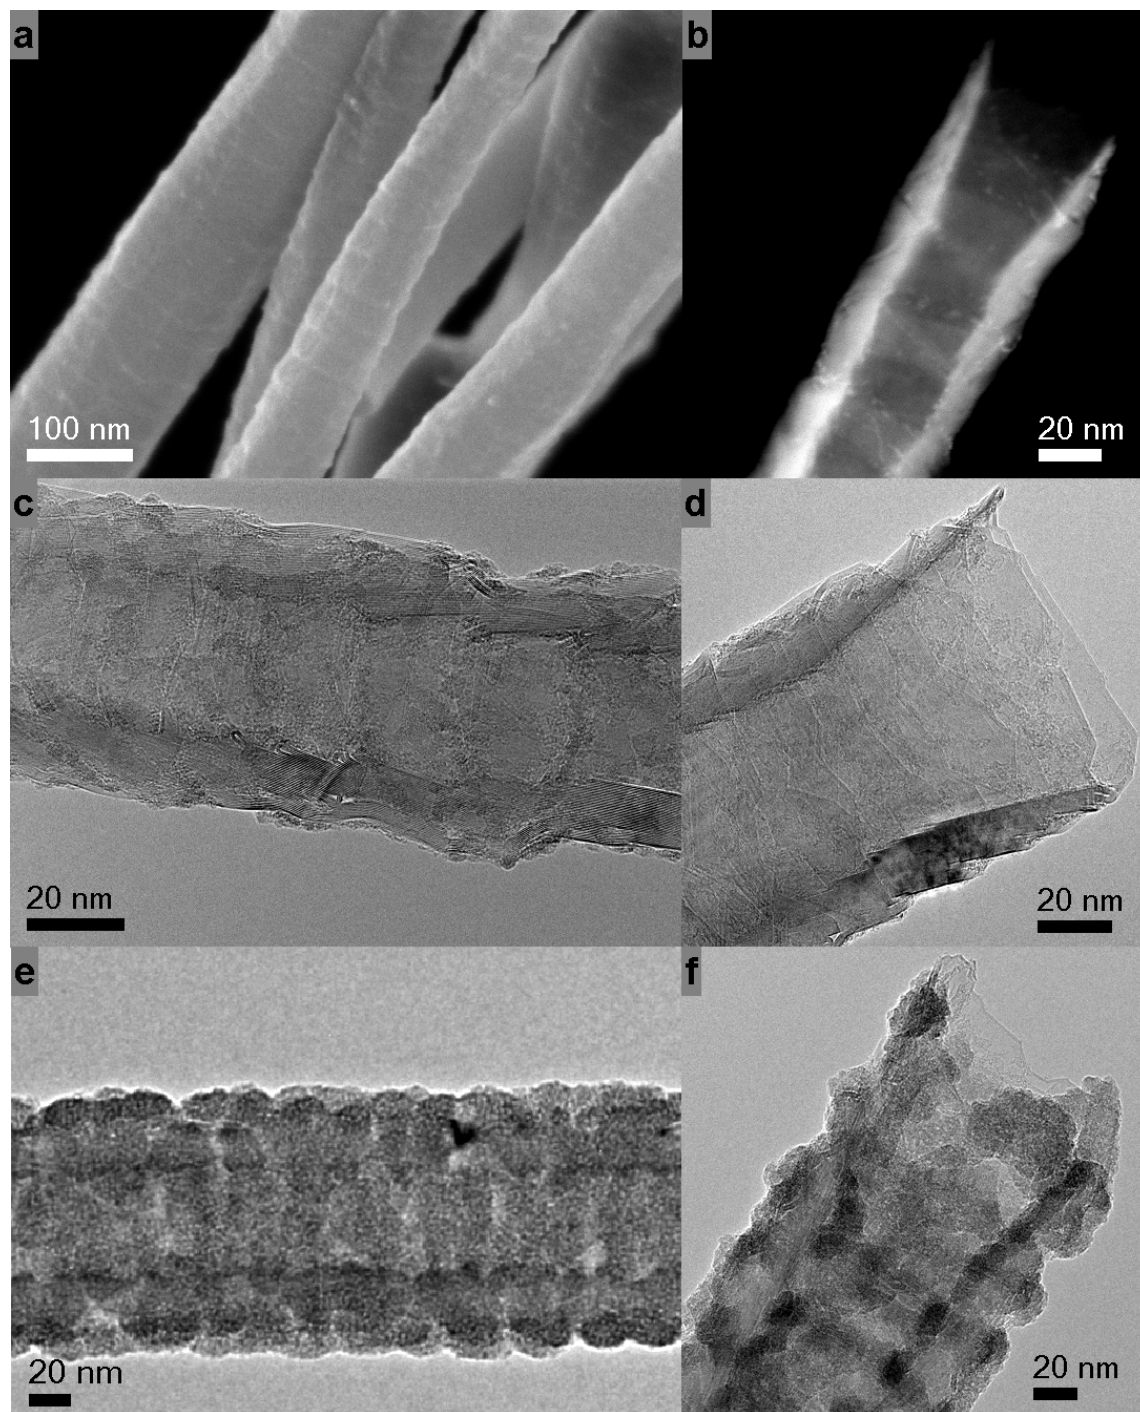

**Figure 5.** (a) SEM, (b) HAADF-STEM, (c,d) HRTEM and (e,f) TEM images of the CNT3000 coated with (b) 25, (a,c,d) 50 and (e,f) 500 TiO<sub>2</sub> ALD cycles.



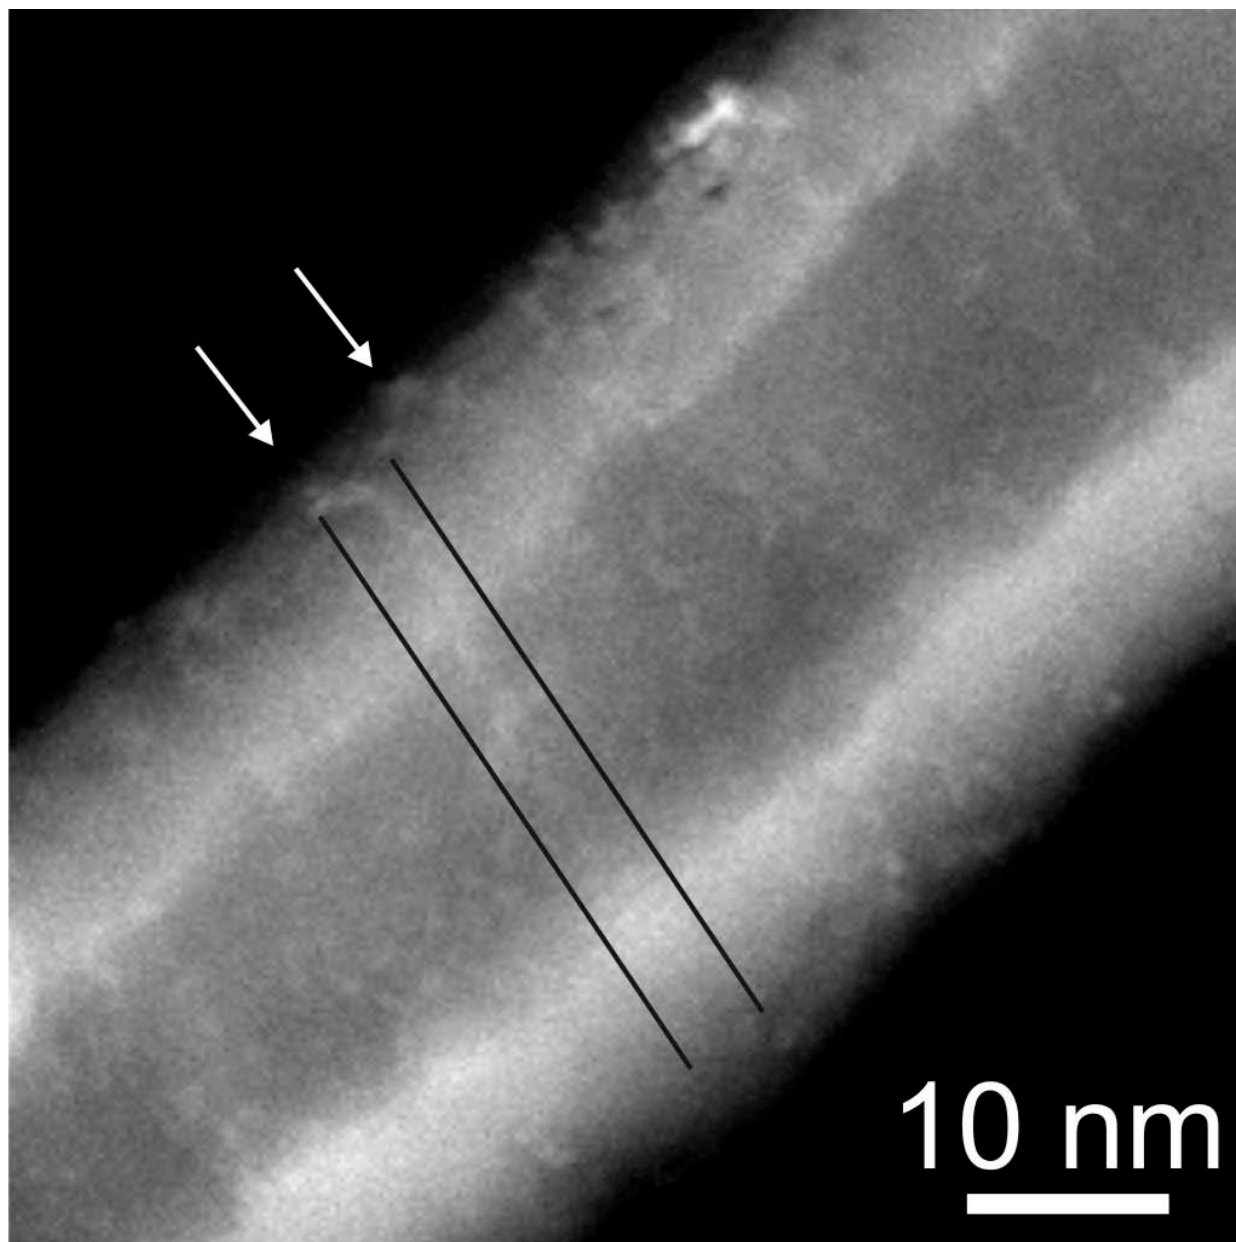

**Figure SI3.** HAADF-STEM image of the CNT3000 coated with 25 TiO<sub>2</sub> ALD cycles



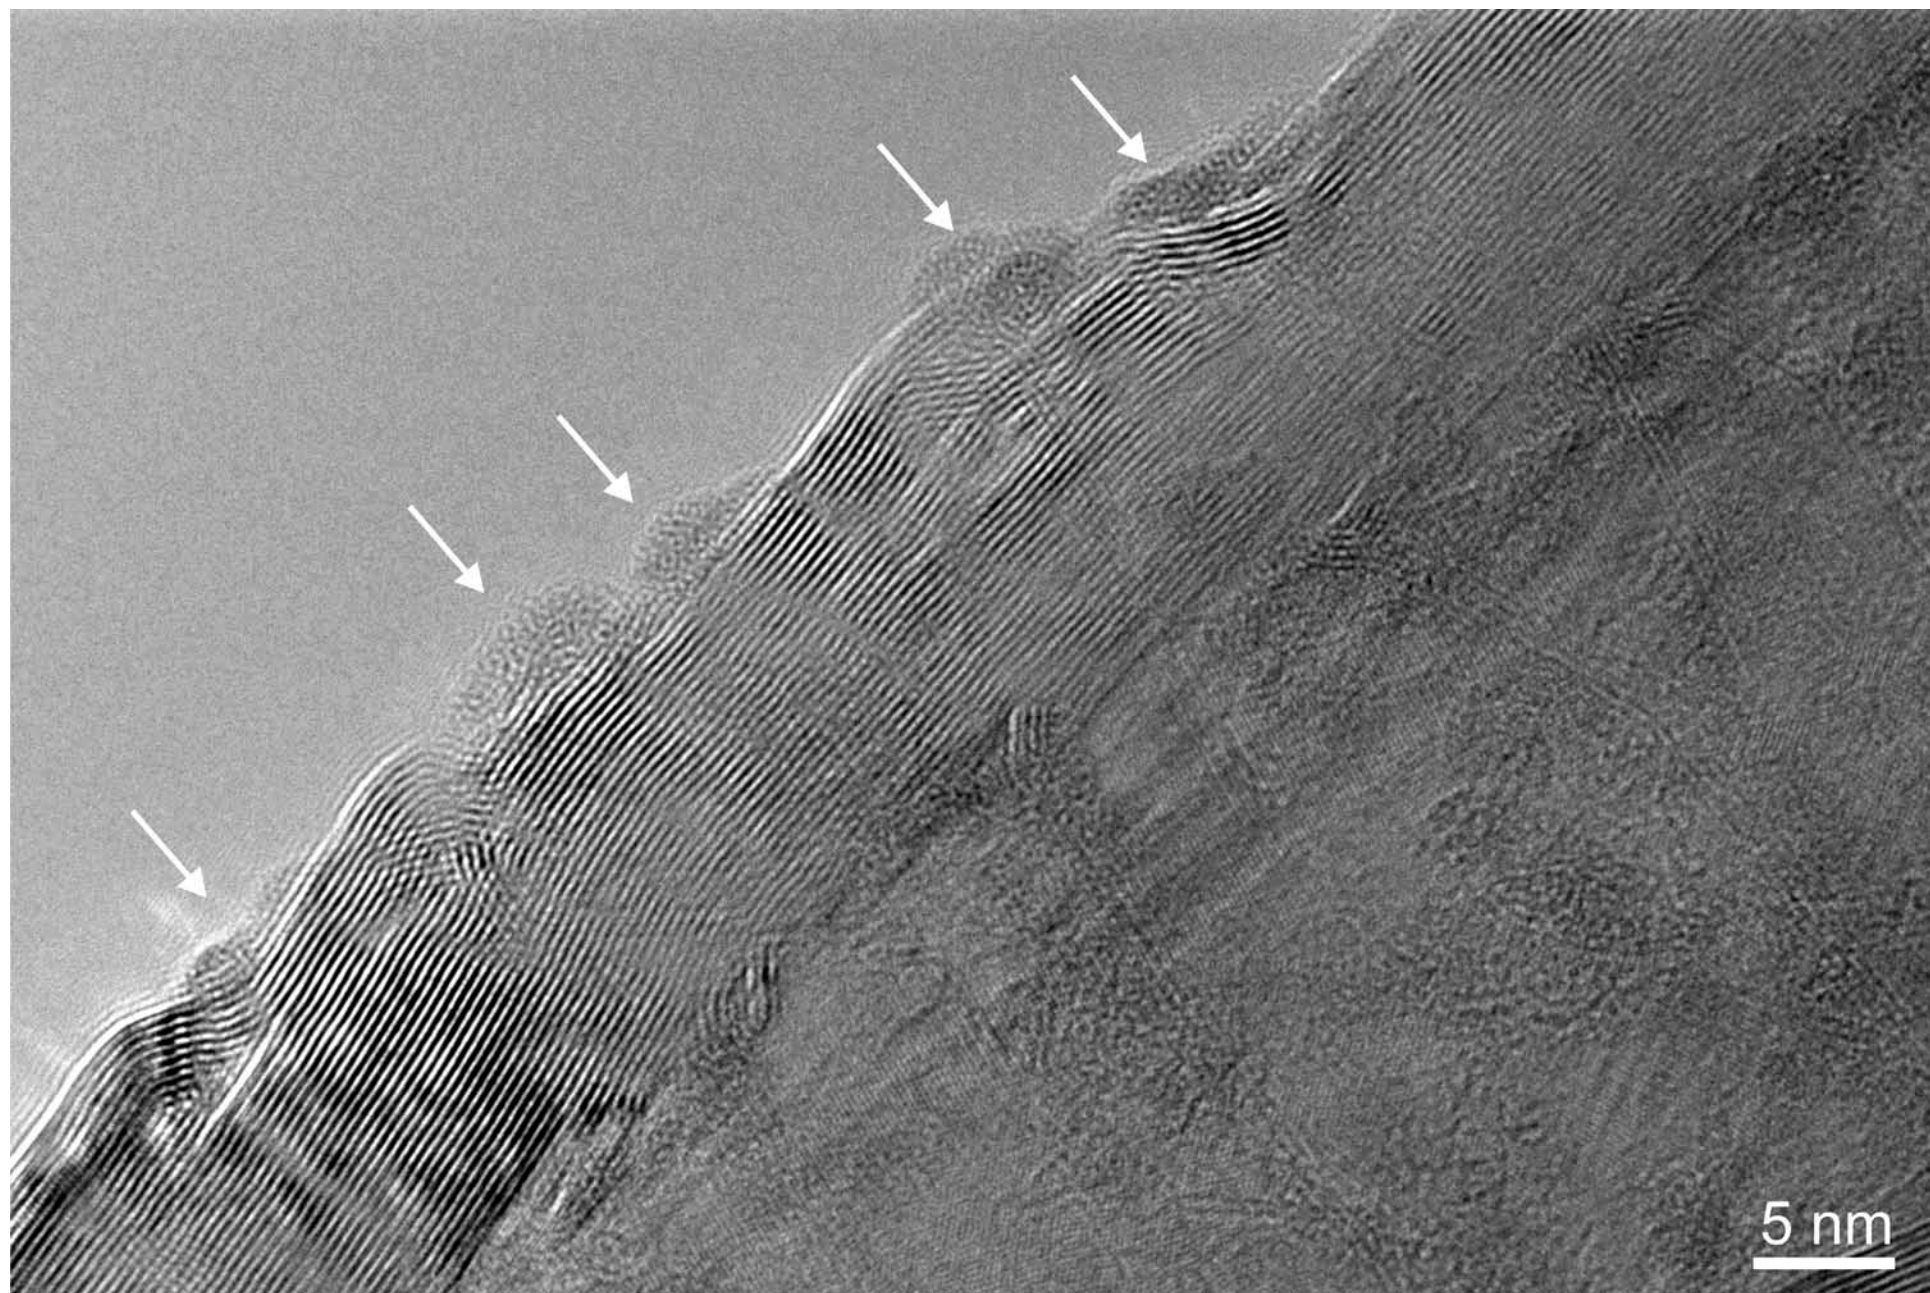

**Figure SI4.** HRTEM image of the CNT3000 coated with 50 TiO<sub>2</sub> ALD cycles



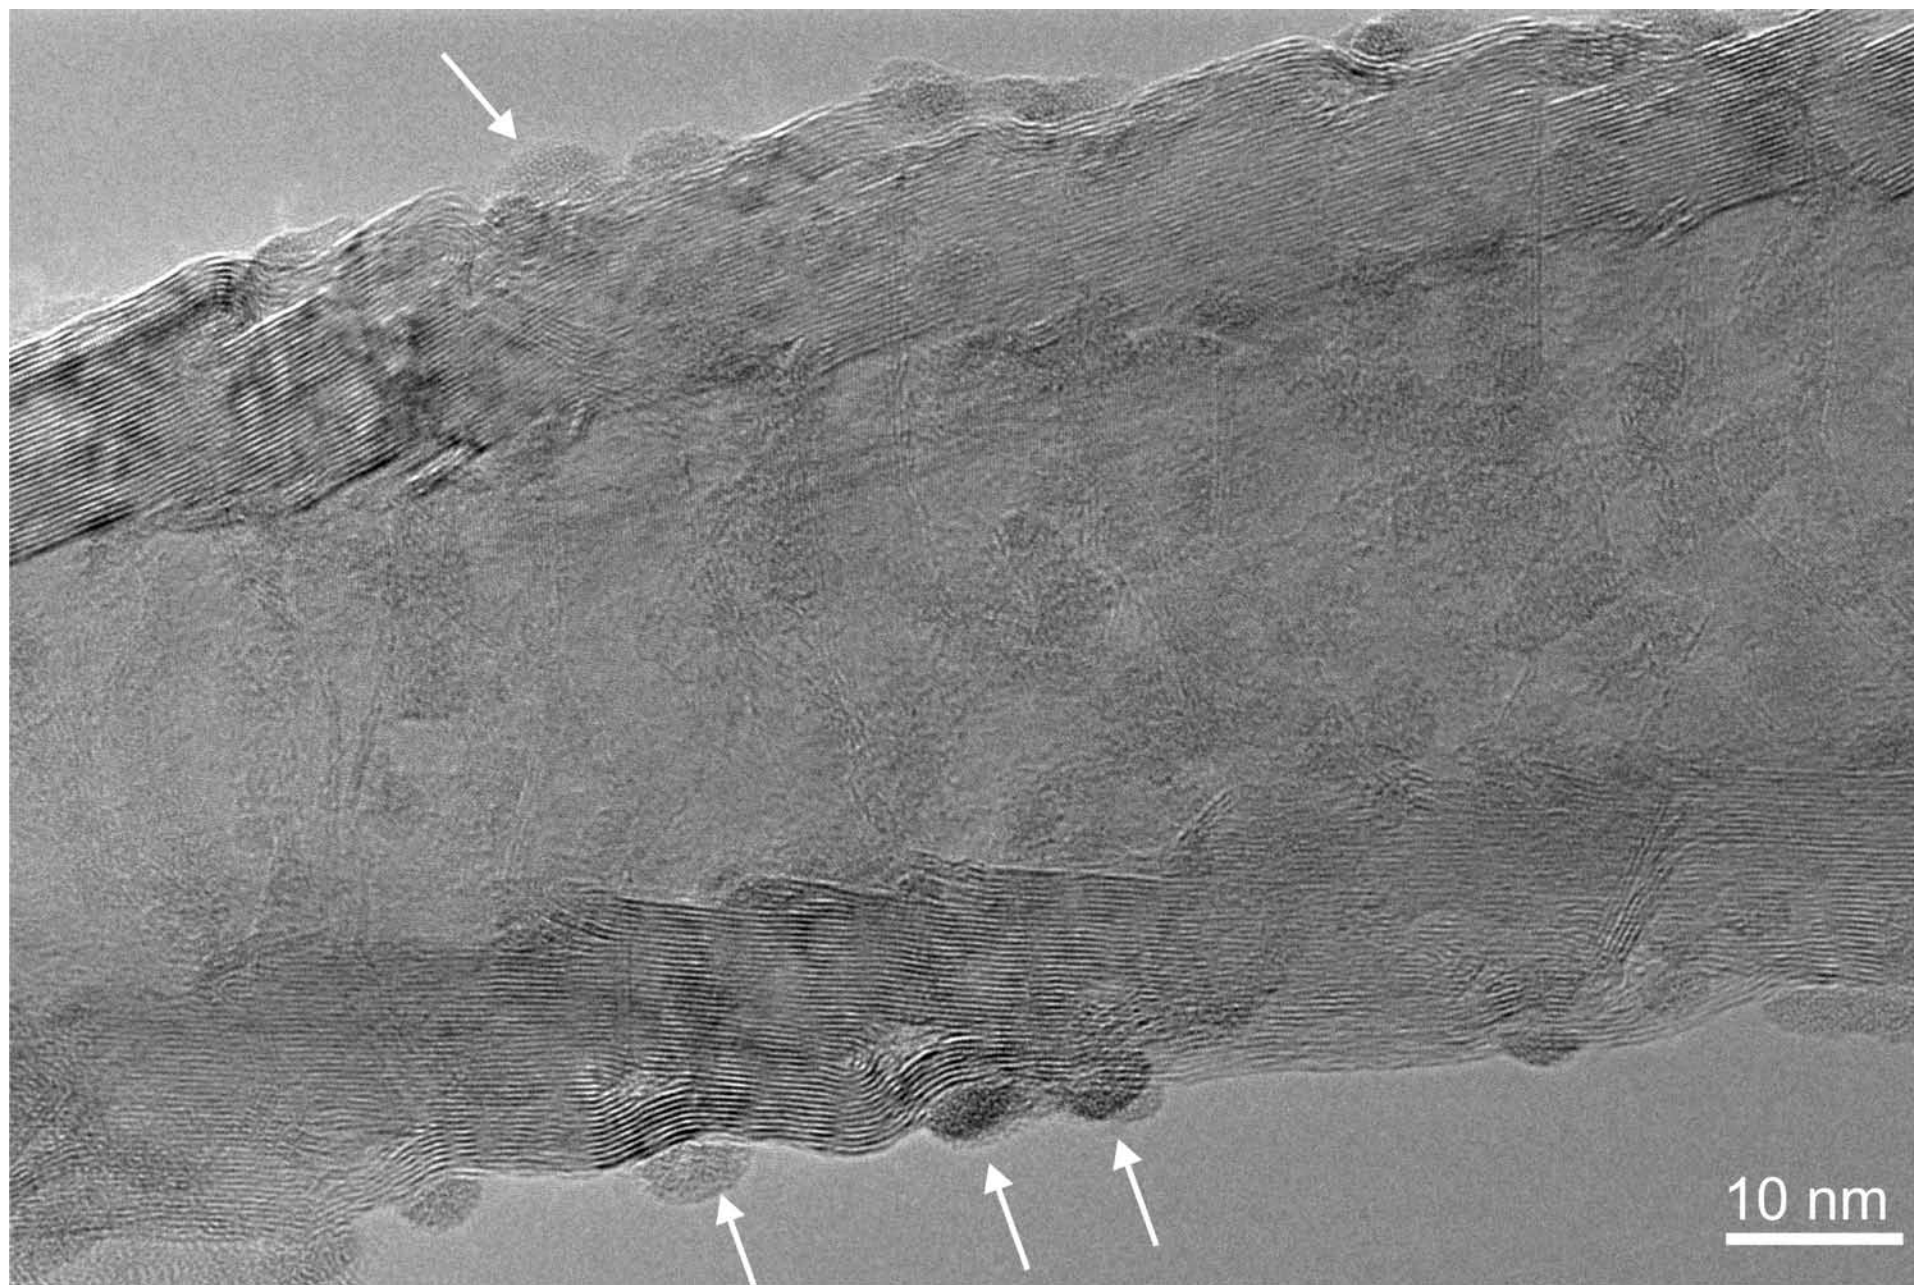

**Figure SI5.** HRTEM image of the CNT3000 coated with 50 TiO<sub>2</sub> ALD cycles



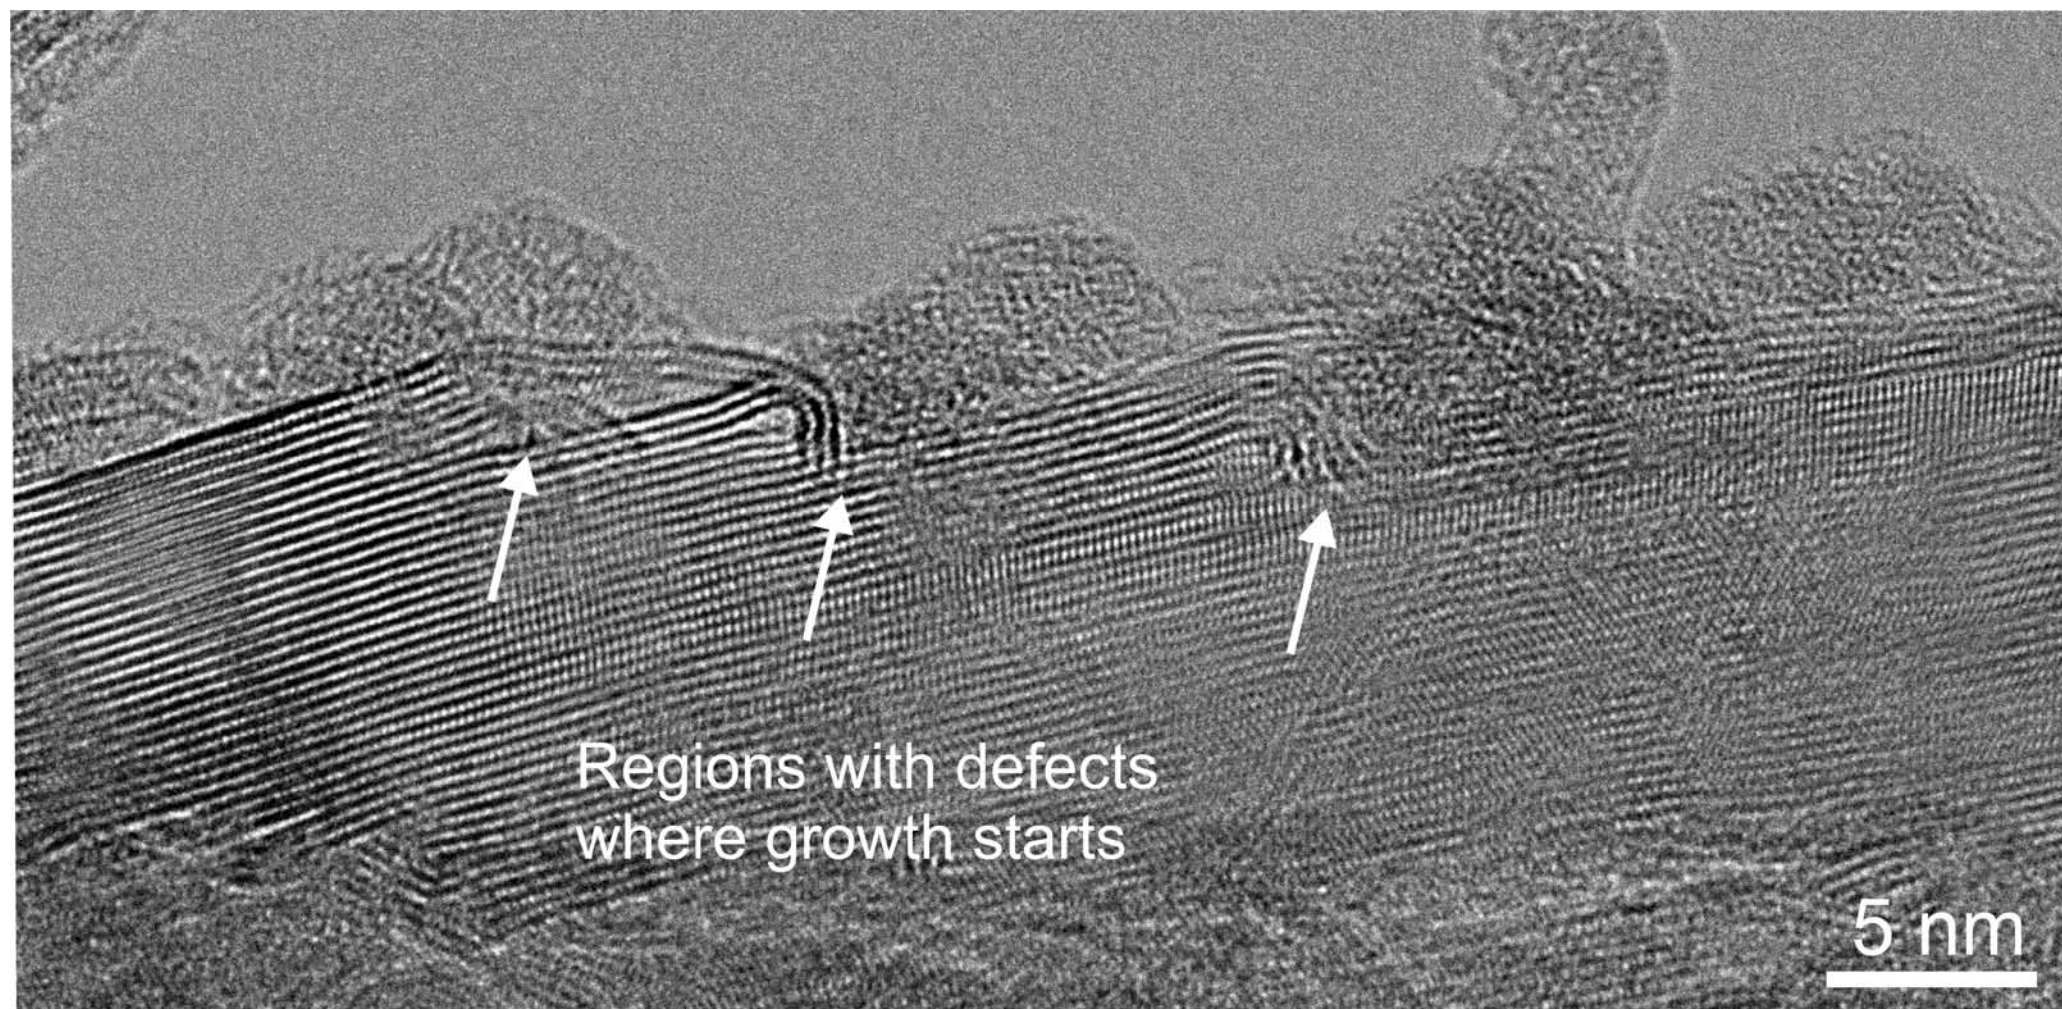

**Figure SI6.** HRTEM image of the CNT3000 coated with 100 TiO<sub>2</sub> ALD cycles



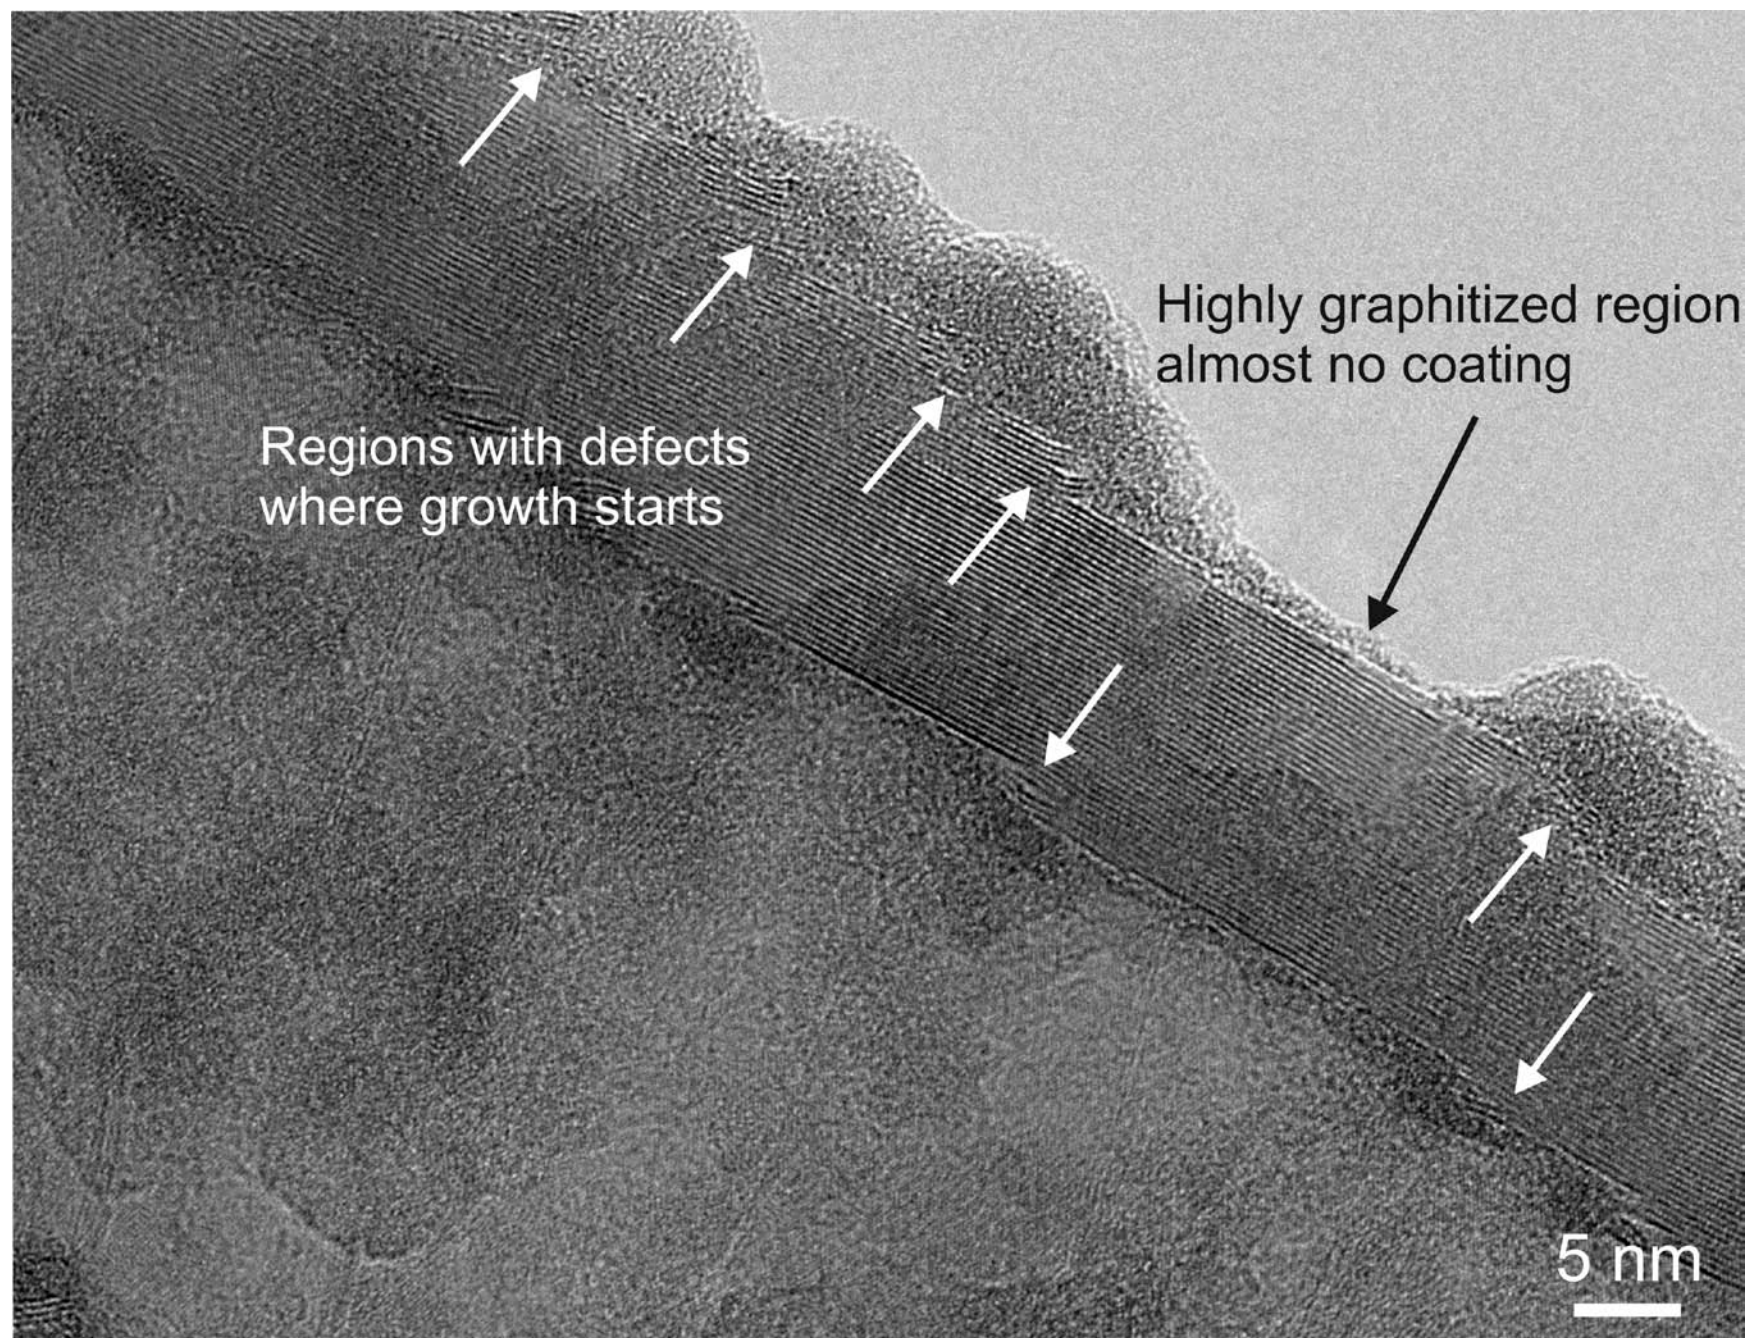

**Figure SI7.** HRTEM image of the CNT3000 coated with 500 TiO<sub>2</sub> ALD cycles



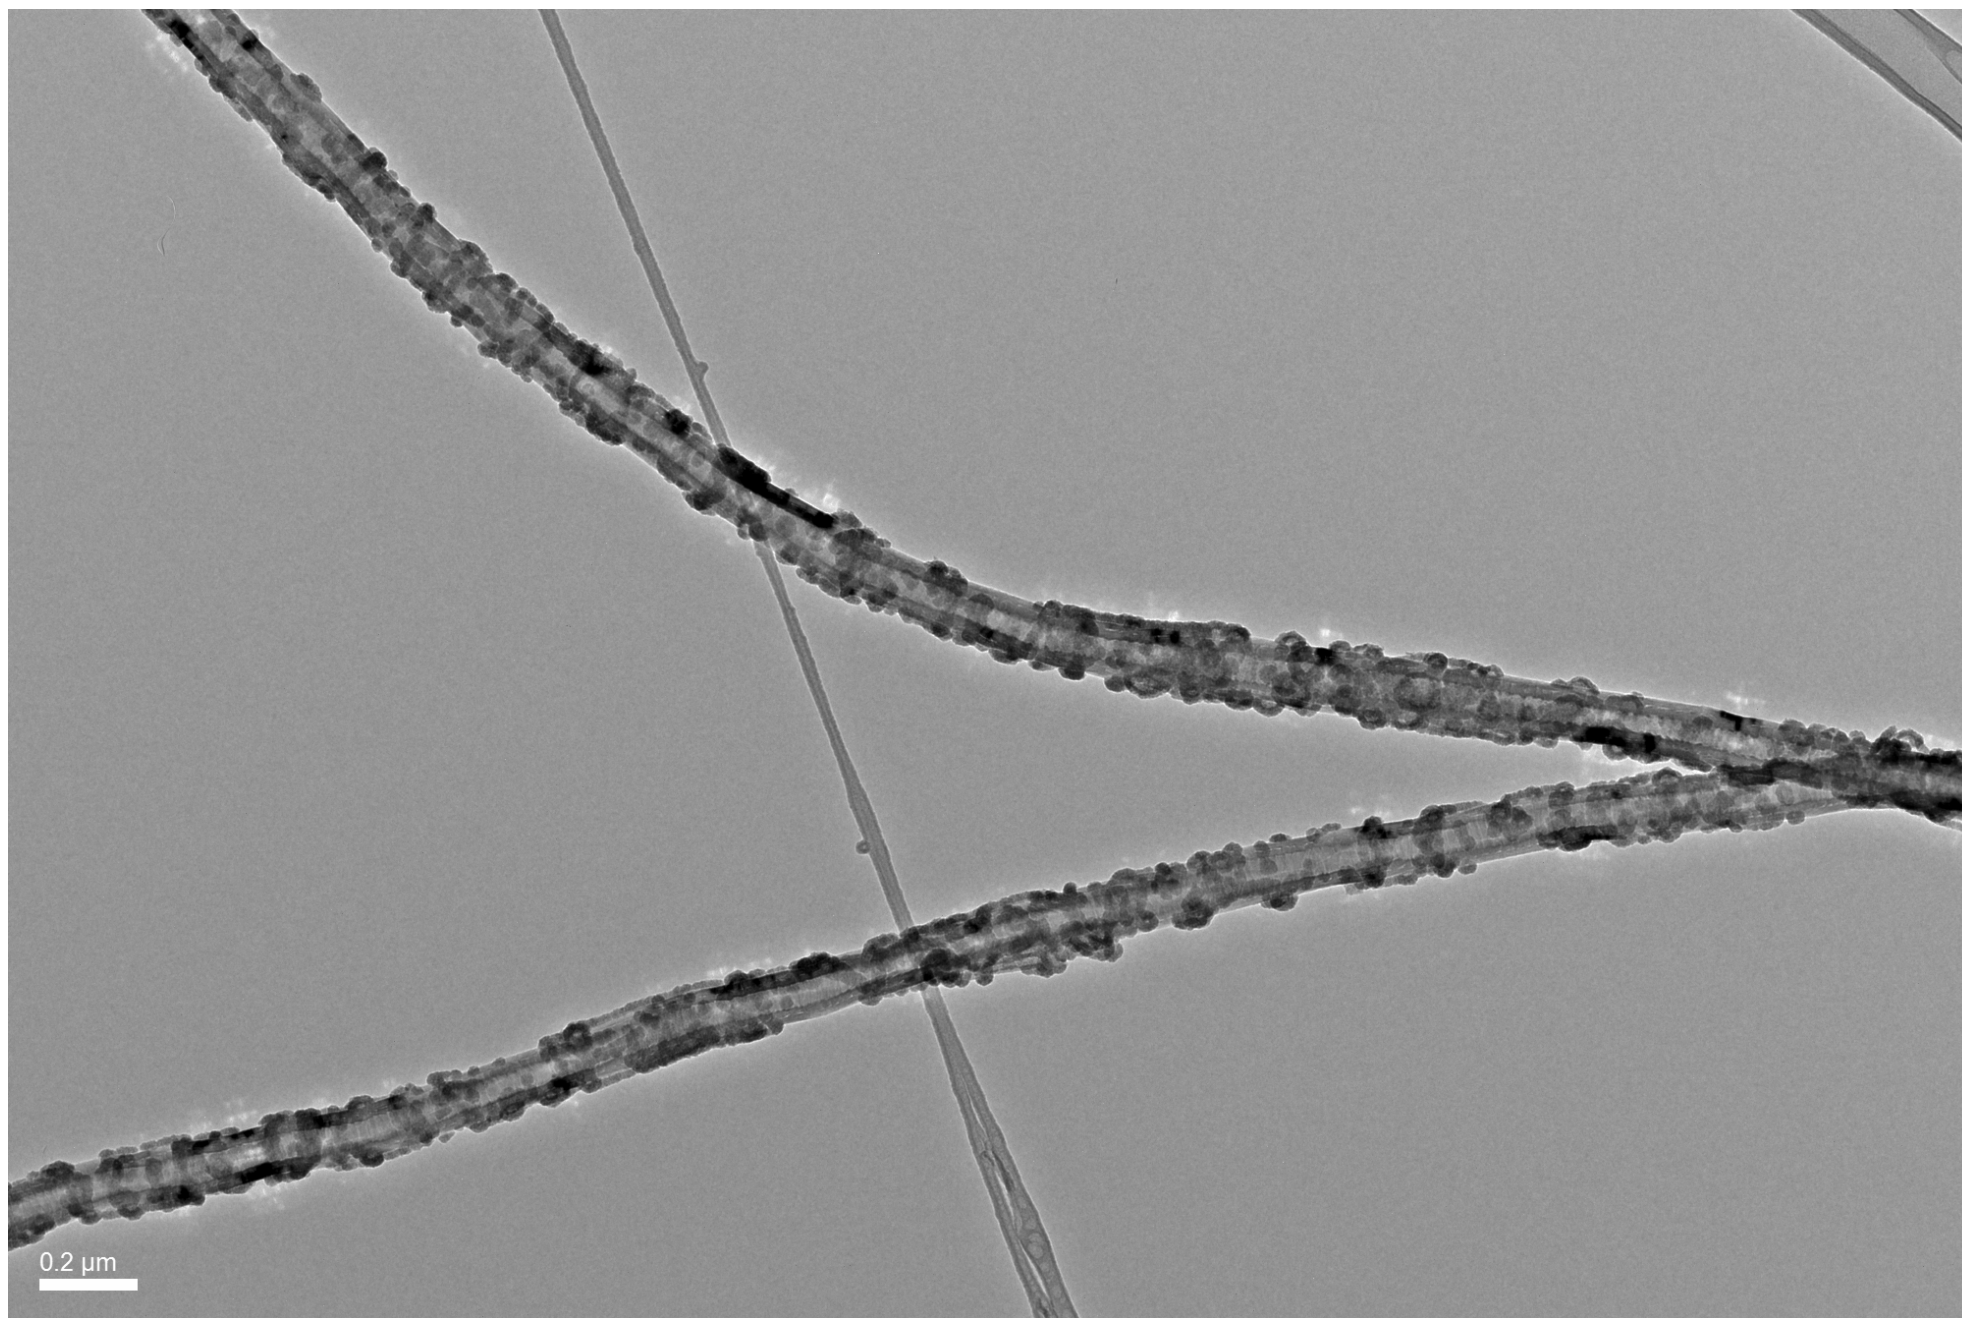

**Figure SI8.** Low resolution TEM image of the CNT3000 coated with 500 TiO<sub>2</sub> ALD cycles showing the nucleation at defect sites which is comparable at different region of the CNT3000.



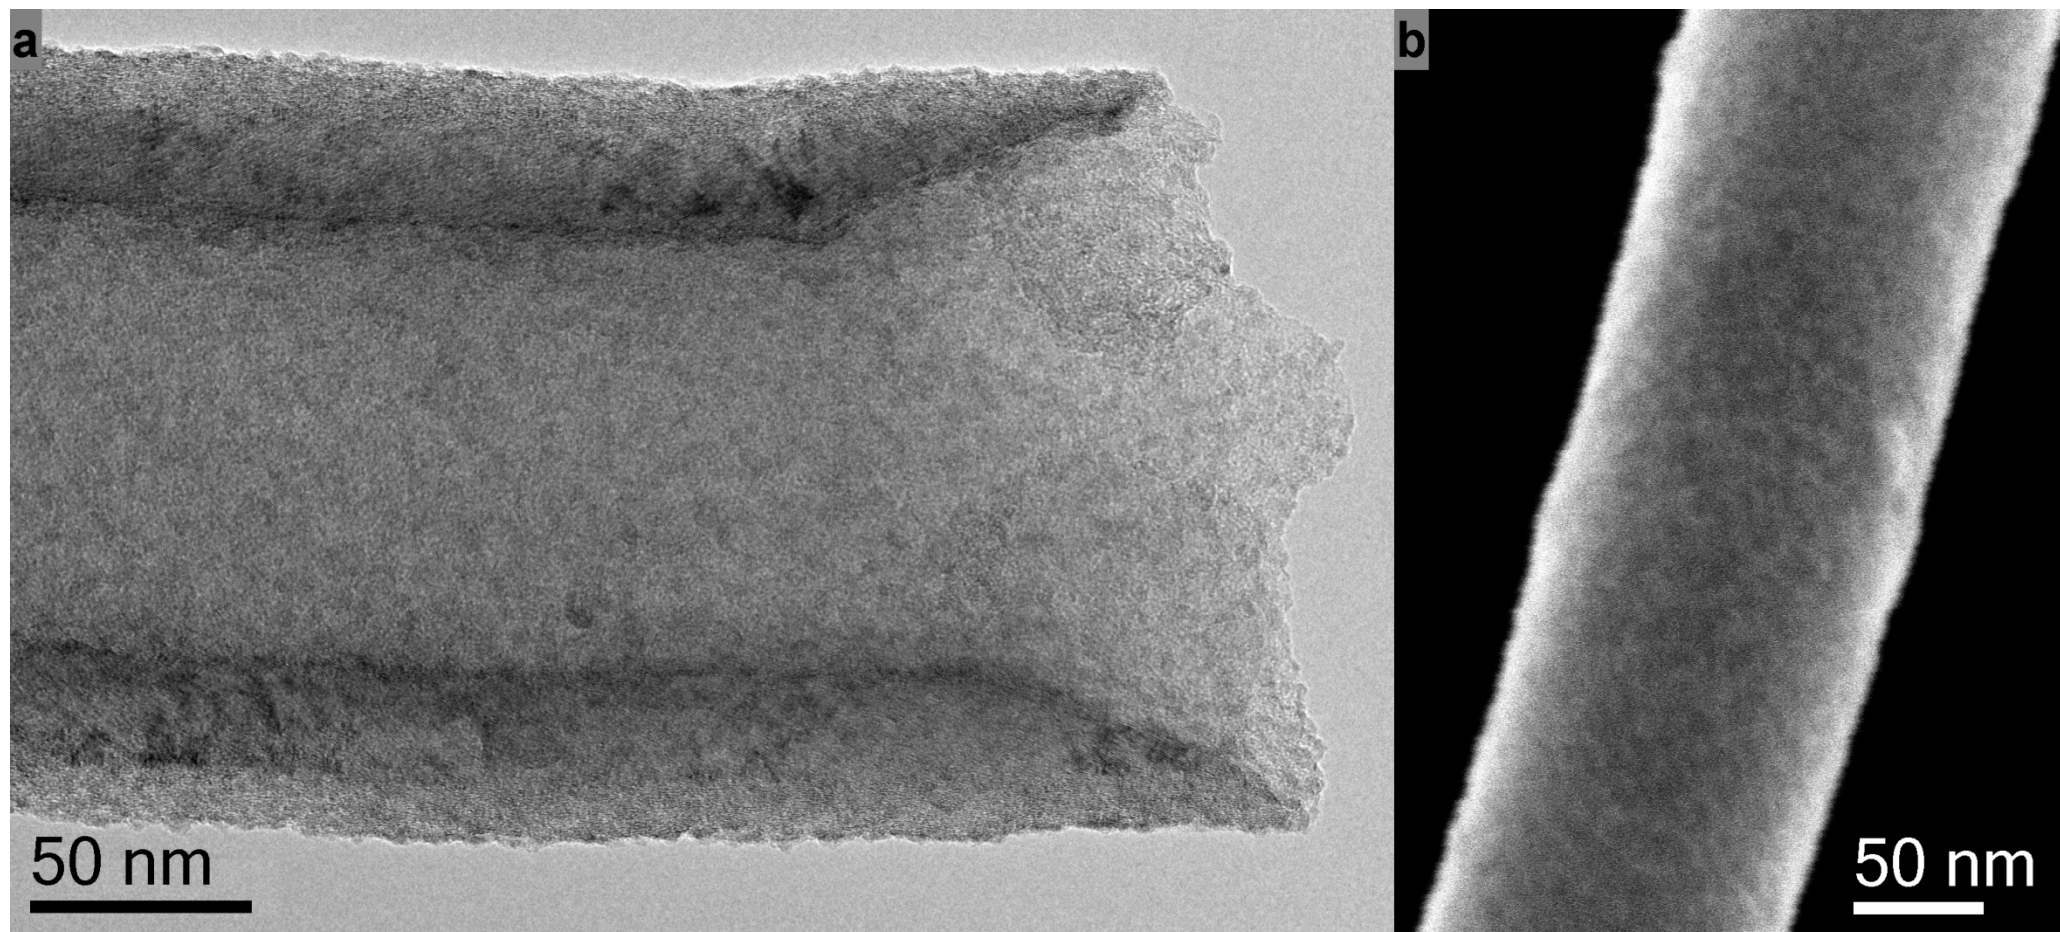

**Figure 6.** HRTEM (a) and SEM (b) images of CNT700D coated with 50 TiO<sub>2</sub> ALD cycles.



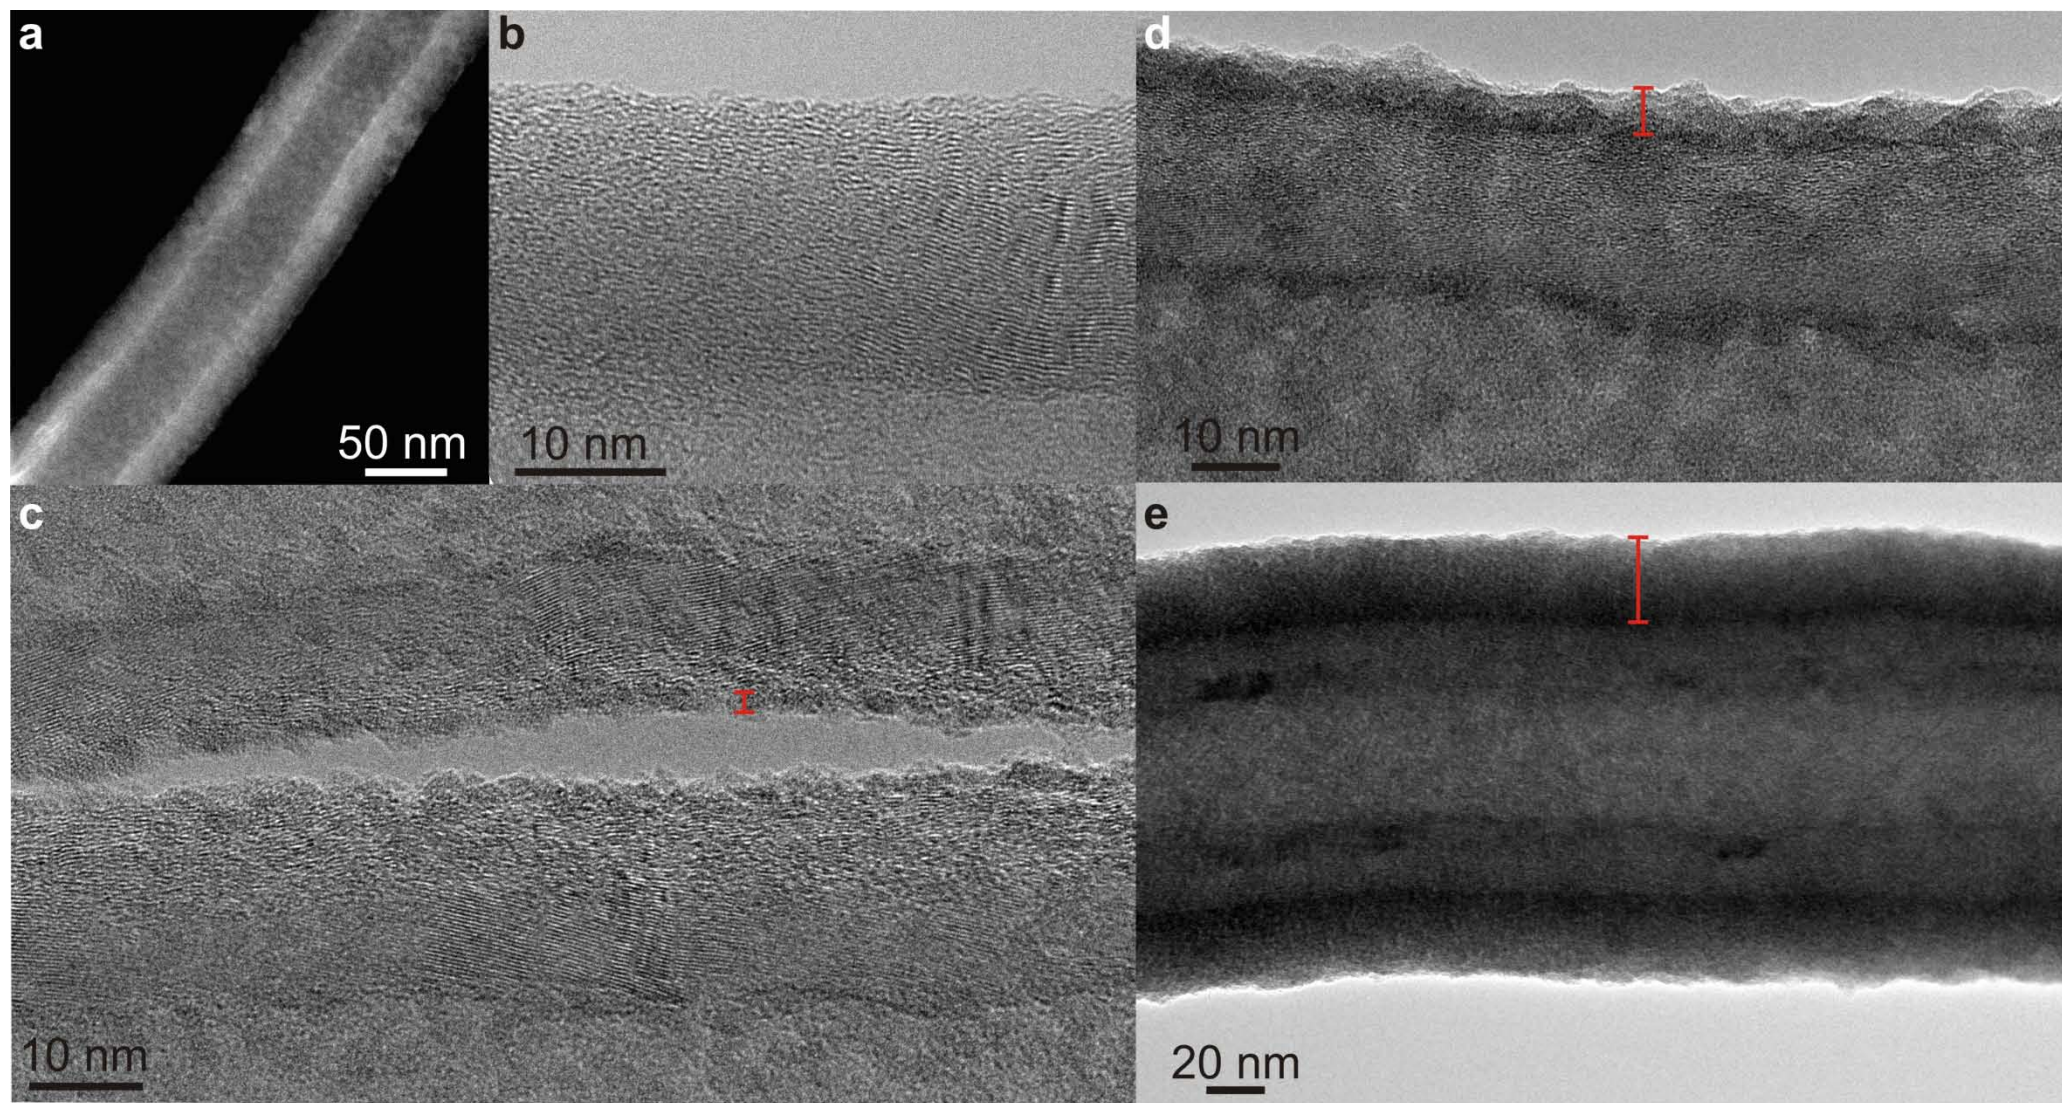

**Figure S19.** a) HAADF-STEM image of CNT700D coated with 100 TiO<sub>2</sub> ALD cycles. HRTEM images of CNT700D coated with 0 (b), 100 (c), 500 (d) and 1000 (e) TiO<sub>2</sub> ALD cycles. N.B. in (c) two neighboring tubes are imaged.

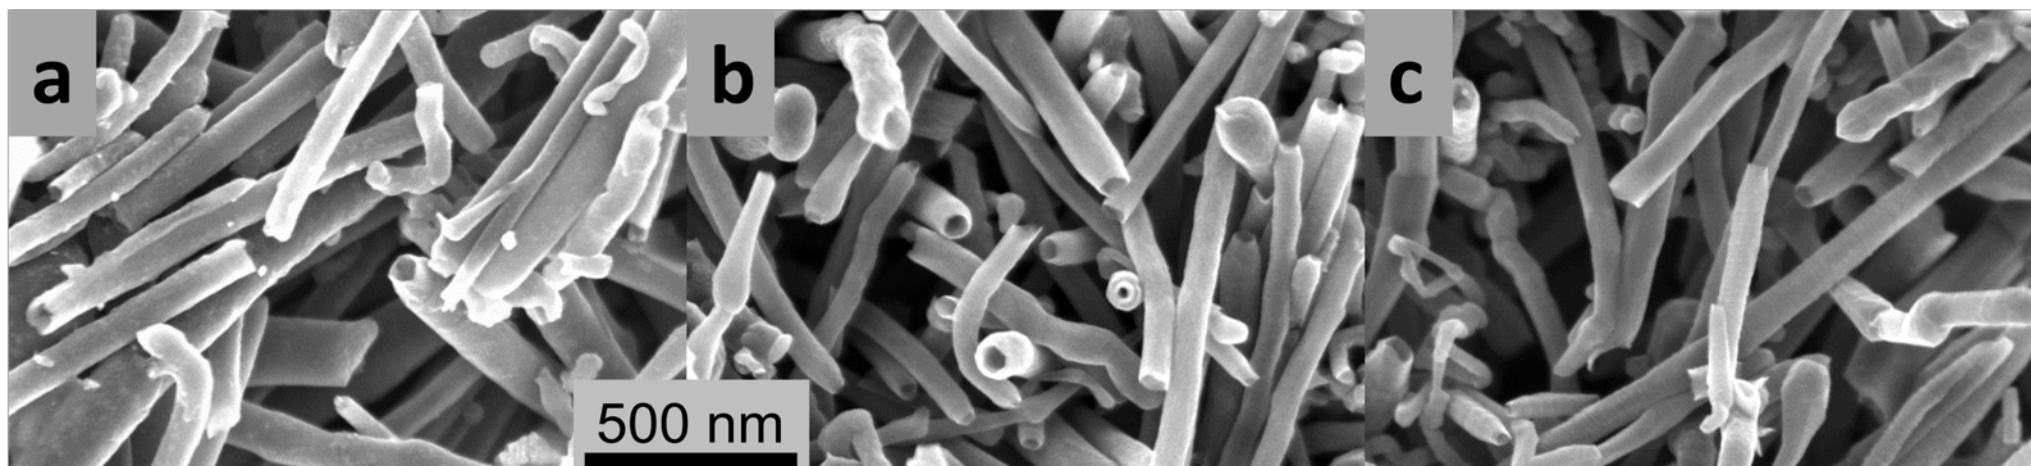

**Figure SI10.** SEM images of the uncoated CNT700 (a), CNT1500 (b) and CNT3000 (c)



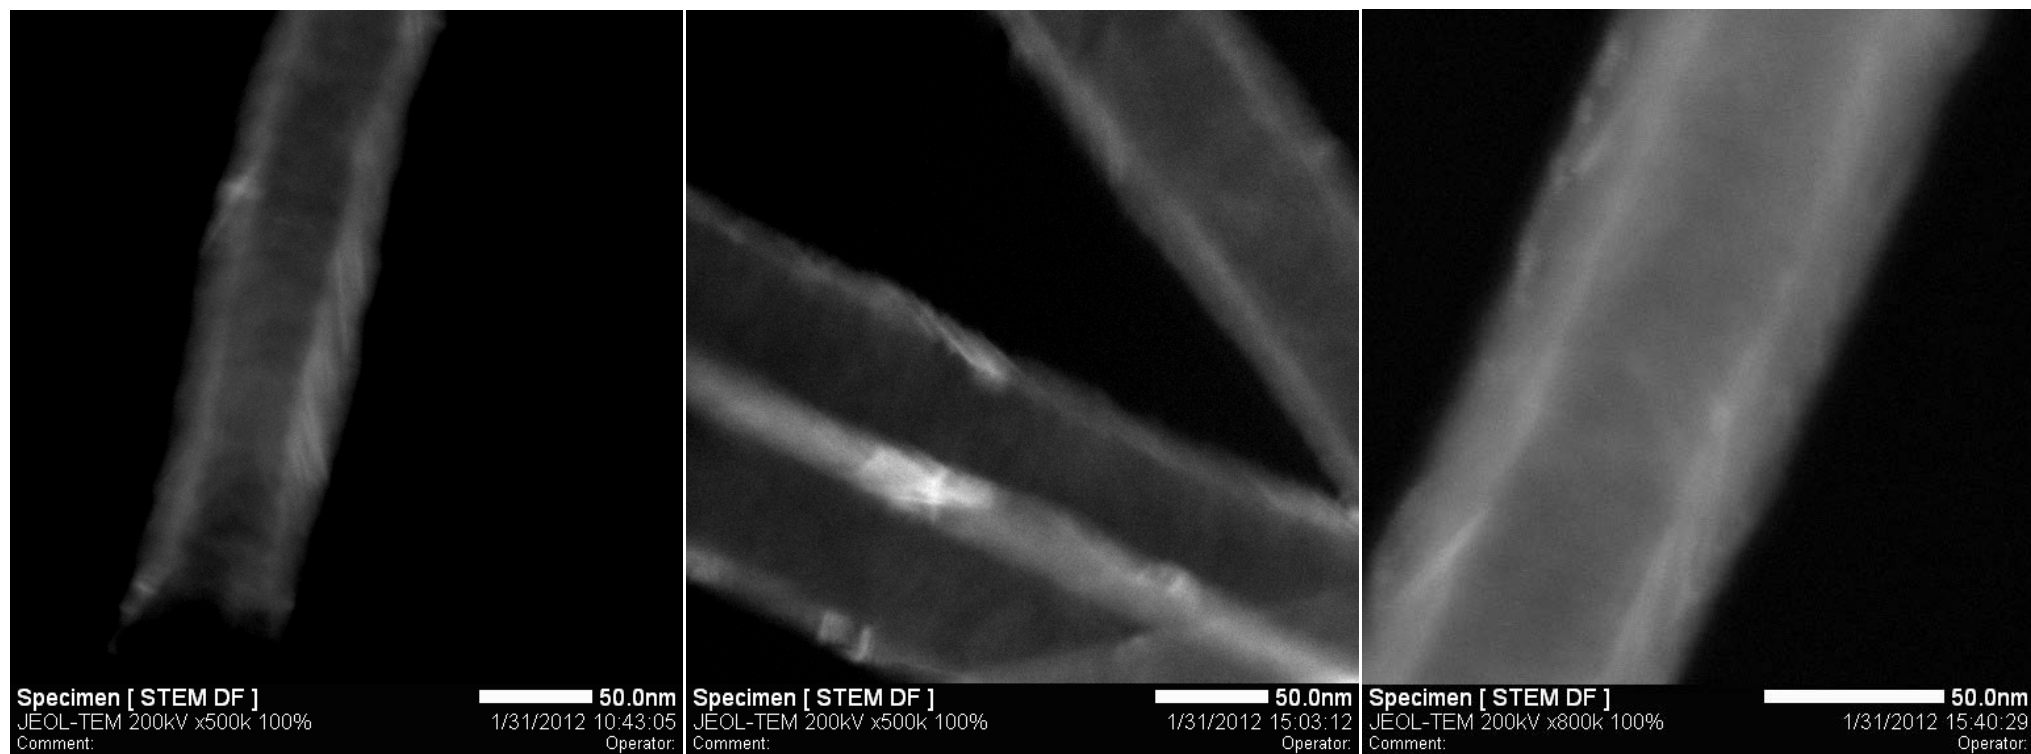

**Figure SI11.** HAADF-STEM images of the uncoated CNT3000
